# Supplementary material for: Removal of Cd2+ from zinc smelter wastewater using graphene oxide foam cross-linked with epichlorohydrin: comprehensive optimization, isotherms, kinetics, and real water column studies
Source: Royal Society of Chemistry journal article supplement (doi:10.1039/d3nj01416a), 2023-01-01
Supplement: d3nj01416a1.pdf [file d3nj01416a1.pdf]

## Removal of Cd<sup>2+</sup> from Zinc Smelter Wastewater Using Graphene Oxide Foam Cross-Linked with Epichlorohydrin: Comprehensive Optimization, Isotherm, Kinetic and Real Water Column Studies

Lakshmi Prasanna Lingamdinne<sup>a</sup>, Ganesh Kumar Reddy Angaru<sup>a</sup>, Yeeun Jeon<sup>a</sup>, Suhyun Lee<sup>a</sup>, Janardhan Reddy Koduru<sup>a\*</sup>, Jae-Kyu Yang<sup>a</sup>, Yoon-Young Chang<sup>a\*</sup>

<sup>a</sup> Department of Environmental Engineering, Kwangwoon University, Seoul 01897, Republic of Korea

\*Corresponding author: [reddyjchem@gmail.com](mailto:reddyjchem@gmail.com) (JR Koduru), [yychang@kw.ac.kr](mailto:yychang@kw.ac.kr) (YY Chang),

### 2.1. Materials and Characterization techniques

#### 2.1.1 Materials

All reagents used in the present study, including Cadmium Nitrate (Cd(NO<sub>3</sub>)<sub>2</sub>), acetic acid, sodium hydroxide (NaOH), hydrochloric acid (HCl), sodium chloride (NaCl), calcium chloride (CaCl<sub>2</sub>), magnesium chloride (MgCl<sub>2</sub>), sodium carbonate (Na<sub>2</sub>CO<sub>3</sub>), sodium nitrate (NaNO<sub>3</sub>), sodium sulfate (Na<sub>2</sub>SO<sub>4</sub>), and sodium phosphate (Na<sub>3</sub>PO<sub>4</sub>), were of analytical grade and were purchased from Samchun Chemicals in South Korea. GO was supplied by the Stranded Graphene Company (South Korea). Chitosan was purchased from Sigma–Aldrich (United).

#### 2.1.2 Analytical studies

X-ray Diffraction analysis was analyzed in the 2θ range of 0–80° with Cu Kα radiation to identify the crystalline/amorphous nature of the GO, CSGO foam, and EPCSGO foam. The presence of different functional groups was detected using Fourier transform infrared (FT-IR) spectrometry (IR Spirit, Shimadzu Corporation, Japan) in the range 4000–400 cm<sup>-1</sup> and X-ray photoelectron

spectroscopy (XPS) (PHI Quanterra-II, Ulvac-PHI, Kanagawa, Japan). Scanning electron microscopy (SEM) combined with energy-dispersive X-ray spectroscopy (EDS) (S-4300 with QUANTAX EDS, Bruker, Germany) was used to investigate the surface morphologies of the CSGO and EPCSGO foams. The N<sub>2</sub> adsorption & desorption isotherms of the fabricated composite were obtained using an Autosorb-1 (Quantachrome Instruments, Boynton Beach, FL, USA) instrument, which was also used to measure the pore size, surface area, and pore width. Inductively coupled plasma-optical emission spectroscopy (ICP-OES; Perkin-Elmer, USA) was used to measure metal concentration. A 340i pH meter was employed to measure all pH readings (WTW, Germany).

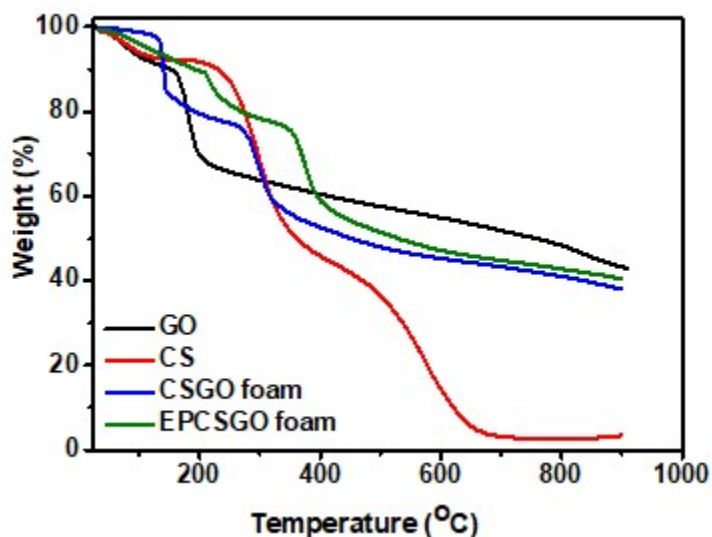

Fig. S1. TGA of GO, CS, CSGO foam and EPCSGO foam. Analyzed at a heating rate of 10 °C min<sup>-1</sup>.

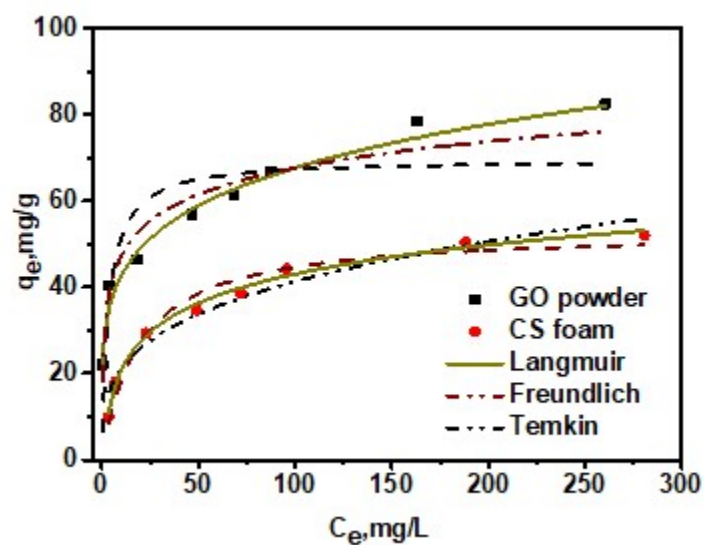

Fig. S2.  $\text{Cd}^{2+}$  adsorption isotherm on GO powder and CS foam (0.5 g/L), at 298 K, pH 6.0 for 300 min equilibrium time.

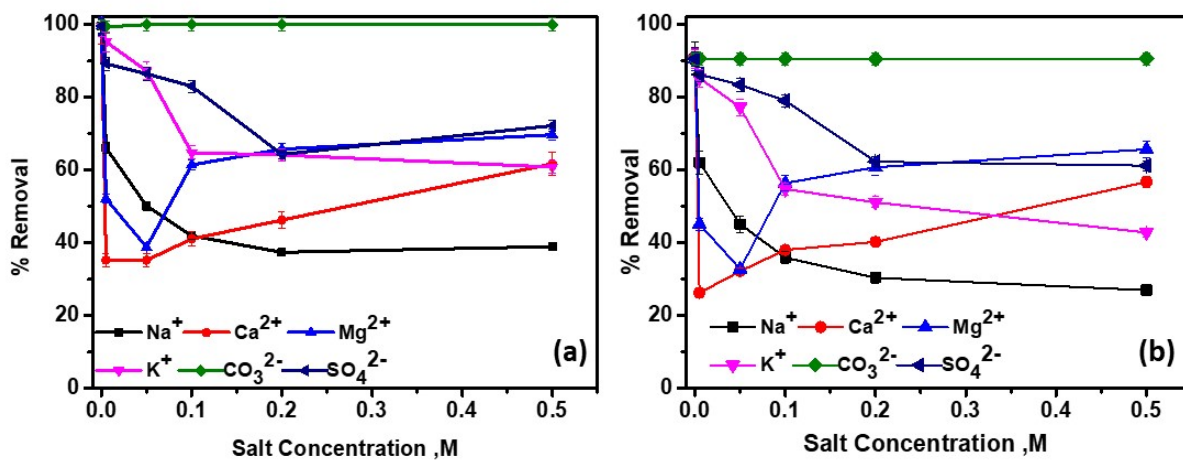

Fig. S3. Salt effect on  $\text{Cd}^{2+}$  (20 mg/L) adsorption on CSGO foam and EPCSGP foam (0.5 g/L), at pH 6.0 and 298K.

Table S1. Heavy metal concentrations in a groundwater sample from the smelter, compared to Korean industrial wastewater effluent standards and Korean drinking water quality standards (Korea Ministry of Environment).

| <b>Factor</b>                      | <b>Concentration in groundwater (mg/L)</b> |
|------------------------------------|--------------------------------------------|
| <b>Cd</b>                          | 81.81                                      |
| <b>Zn</b>                          | 988.7                                      |
| <b>Fe</b>                          | 39.6                                       |
| <b>Mn</b>                          | 113.0                                      |
| <b>Cu</b>                          | 3.7                                        |
| <b>Al</b>                          | 119.8                                      |
| <b>K</b>                           | 38.9                                       |
| <b>Na</b>                          | 125.8                                      |
| <b>Ca</b>                          | 227.3                                      |
| <b>Mg</b>                          | 133.9                                      |
| <b>SO<sub>4</sub><sup>2-</sup></b> | 5120                                       |
| <b>Cl<sup>-</sup></b>              | 96                                         |
| <b>NO<sub>3</sub><sup>-</sup></b>  | 23.3                                       |
| <b>NH<sub>4</sub><sup>+</sup></b>  | 21.30                                      |
| <b>TOC</b>                         | 1.9                                        |

Table S2. Thermodynamic studies of Cd<sup>2+</sup> on EPCSGO foam (pH = 6.0 and dose = 0.5 g /L)

| <b>Temperature, K</b> | <b><math>\Delta G^\circ = -RT \ln K_c</math>, (kJ/mol)</b> | <b>(<math>\Delta H^\circ</math>), kJ/mol</b> | <b>(<math>\Delta S^\circ</math>), J/mol. K</b> | <b>lnKc</b> |
|-----------------------|------------------------------------------------------------|----------------------------------------------|------------------------------------------------|-------------|
| 298                   | -38.885                                                    | 33.831                                       | 122.66                                         | 13.120      |
| 308                   | -40.637                                                    |                                              |                                                | 13.526      |
| 323                   | -43.668                                                    |                                              |                                                | 13.931      |

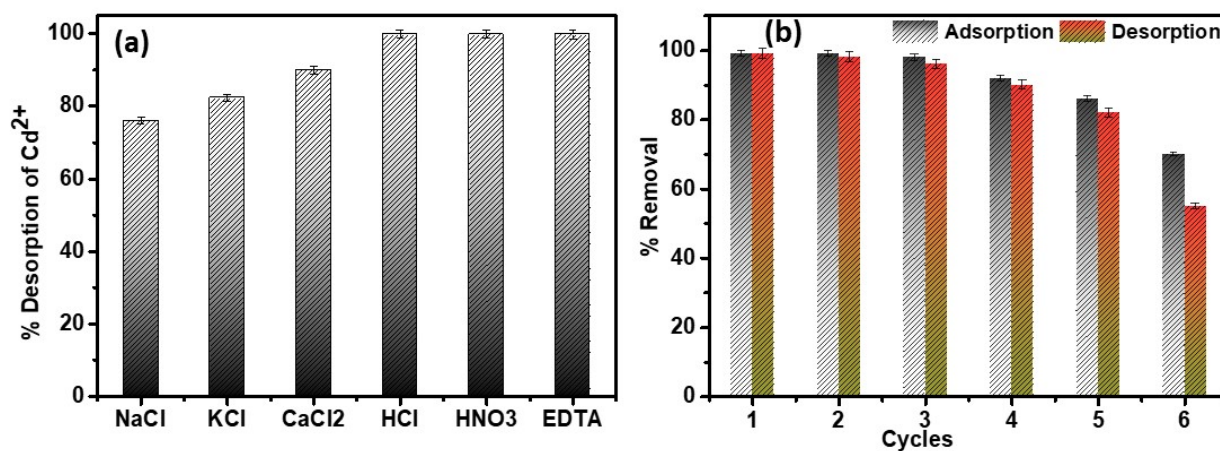

Fig. S4.  $\text{Cd}^{2+}$  desorption on EPCSGO foam with different desorption reagents (a),  $\text{Cd}^{2+}$  adsorption and desorption on EPCSGP foam with 0.1 M EDTA.

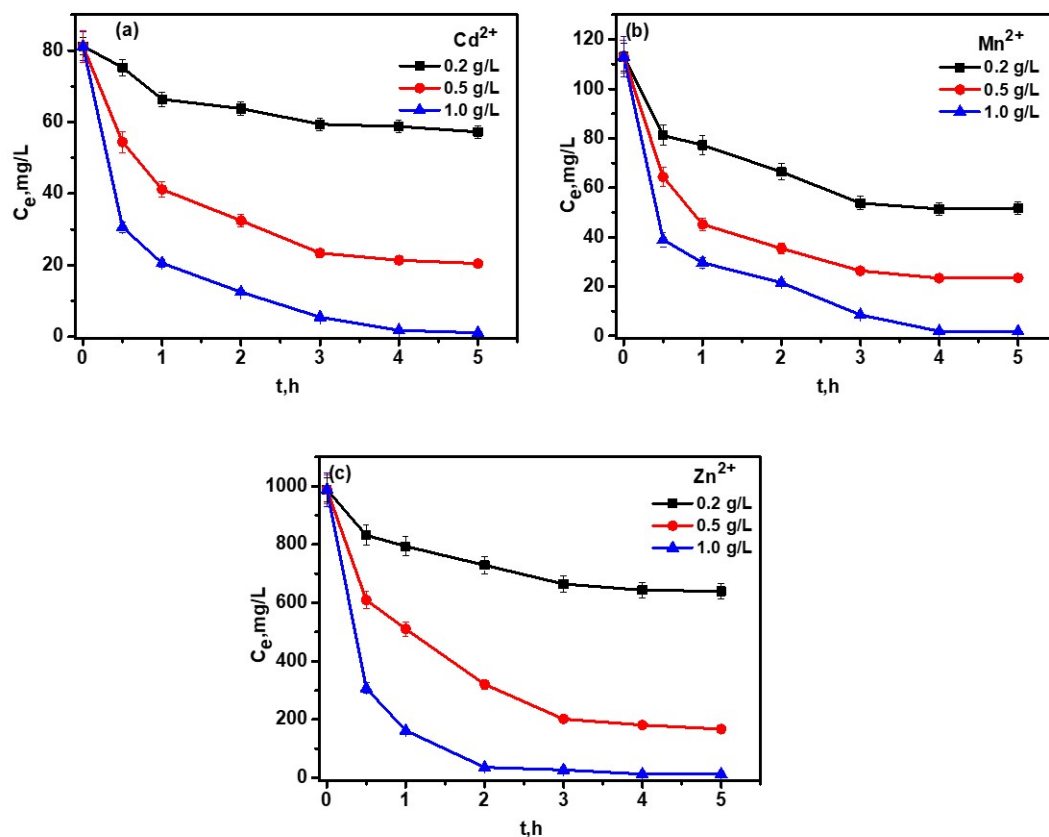

Fig. S5. (a)  $\text{Cd}^{2+}$ , (b)  $\text{Mn}^{2+}$  and (c)  $\text{Zn}^{2+}$  removal after injection of various concentration of  $\text{NaHCO}_3$  into the industrial smelt wastewater.

Table S3. Modeling of Cd<sup>2+</sup> removal in a fixed bed column utilizing EPCSGO foam.

|                           | Thomas                          |                           | R <sup>2</sup> | Bohart–Adams                |                                              | R <sup>2</sup> | Yoon–Nelson                           |          | R <sup>2</sup> |
|---------------------------|---------------------------------|---------------------------|----------------|-----------------------------|----------------------------------------------|----------------|---------------------------------------|----------|----------------|
|                           | k <sub>Th</sub><br>(L/<br>mg·h) | Q <sub>Th</sub><br>(mg/g) |                | k <sub>ab</sub><br>(L/mg·h) | Q <sub>ab</sub><br>(mg/c<br>m <sup>3</sup> ) |                | k <sub>YN</sub><br>(h <sup>-1</sup> ) | τ<br>(h) |                |
| Synthetic water           | 0.003                           | 122.08                    | 0.992          | 0.002                       | 25.41                                        | 0.914          | 0.073                                 | 692      | 0.955          |
| Industrial waste<br>water | 0.25                            | 35.95                     | 0.989          | 0.114                       | 0.54                                         | 0.916          | 0.008                                 | 299      | 0.955          |
